# Supplementary material for: Loss of p16 expression is a sensitive marker of CDKN2A homozygous deletion in malignant meningiomas
Source: Springer Nature journal article supplement (doi:10.1007/s00401-023-02544-6), 2023-02-01
Supplement: MOESM1 [file 23979738]

H&E

p16

Copy Number Plot

Case 36  
CDKN2A HD

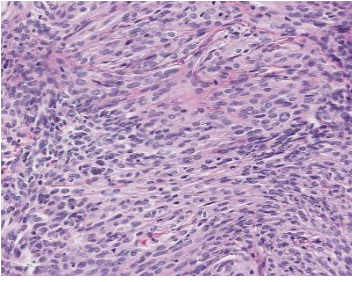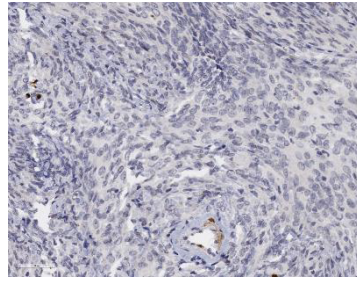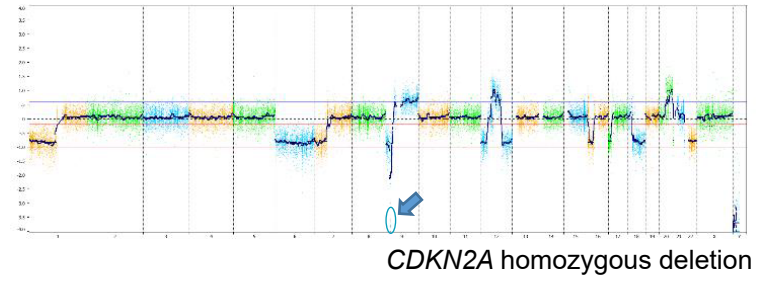

Case 37  
CDKN2A HD

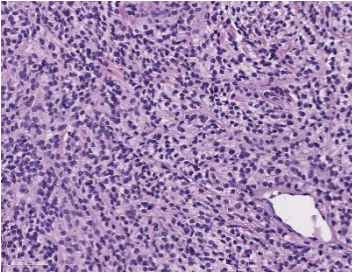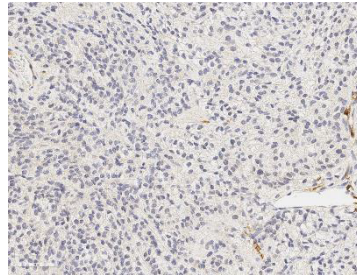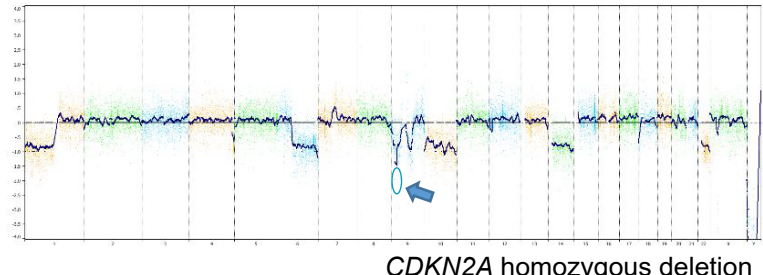

Case 39  
CDKN2A HD

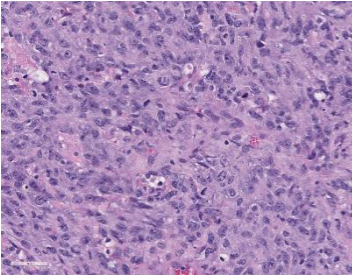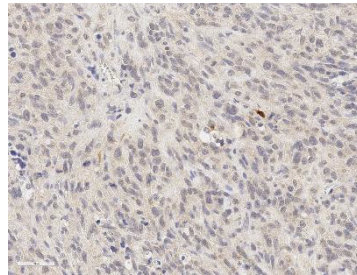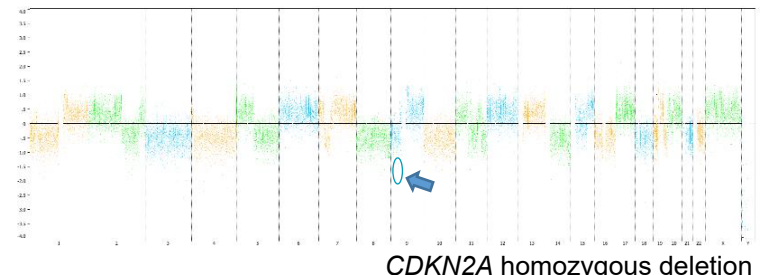

Case 40  
CDKN2A HD

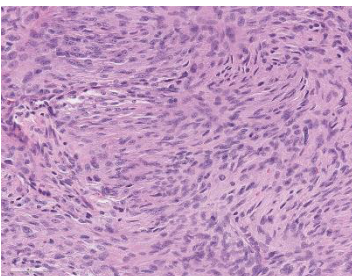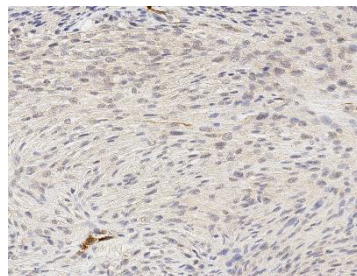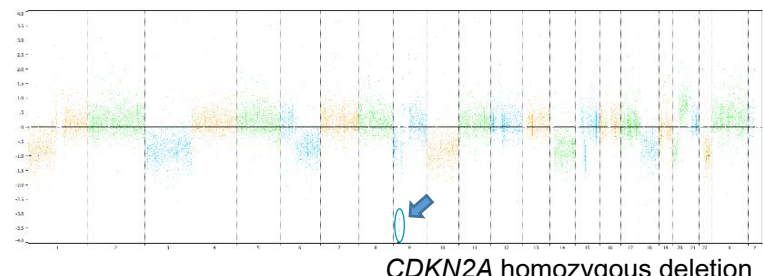

Case 42  
CDKN2A HD

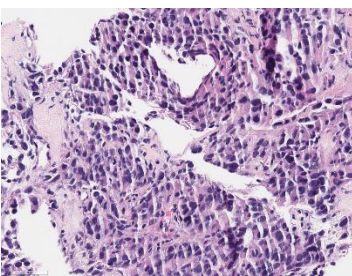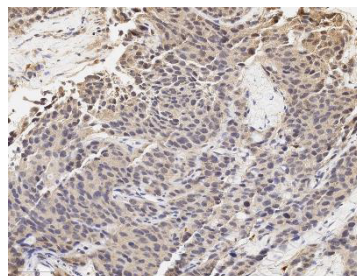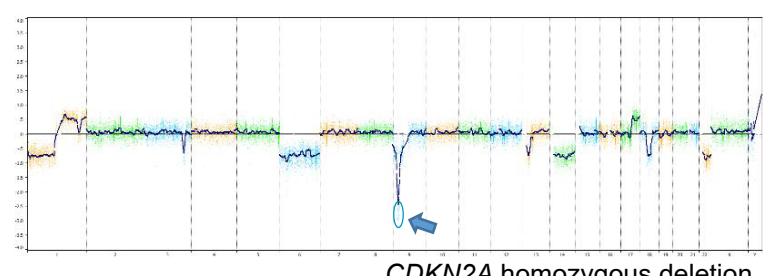

Case 43  
CDKN2A FS

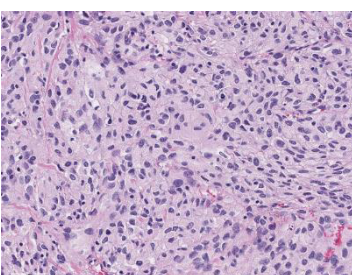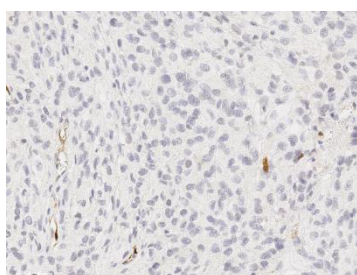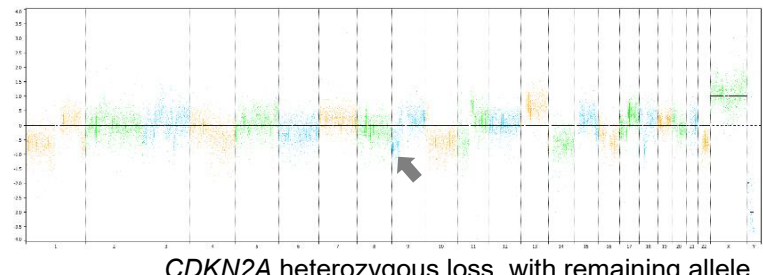

**Supplementary Figure 1.** Loss of p16 expression in *CDKN2A*-altered meningiomas. Homozygous deletion (HD), frameshift mutation (FS)

H&amp;E

p16

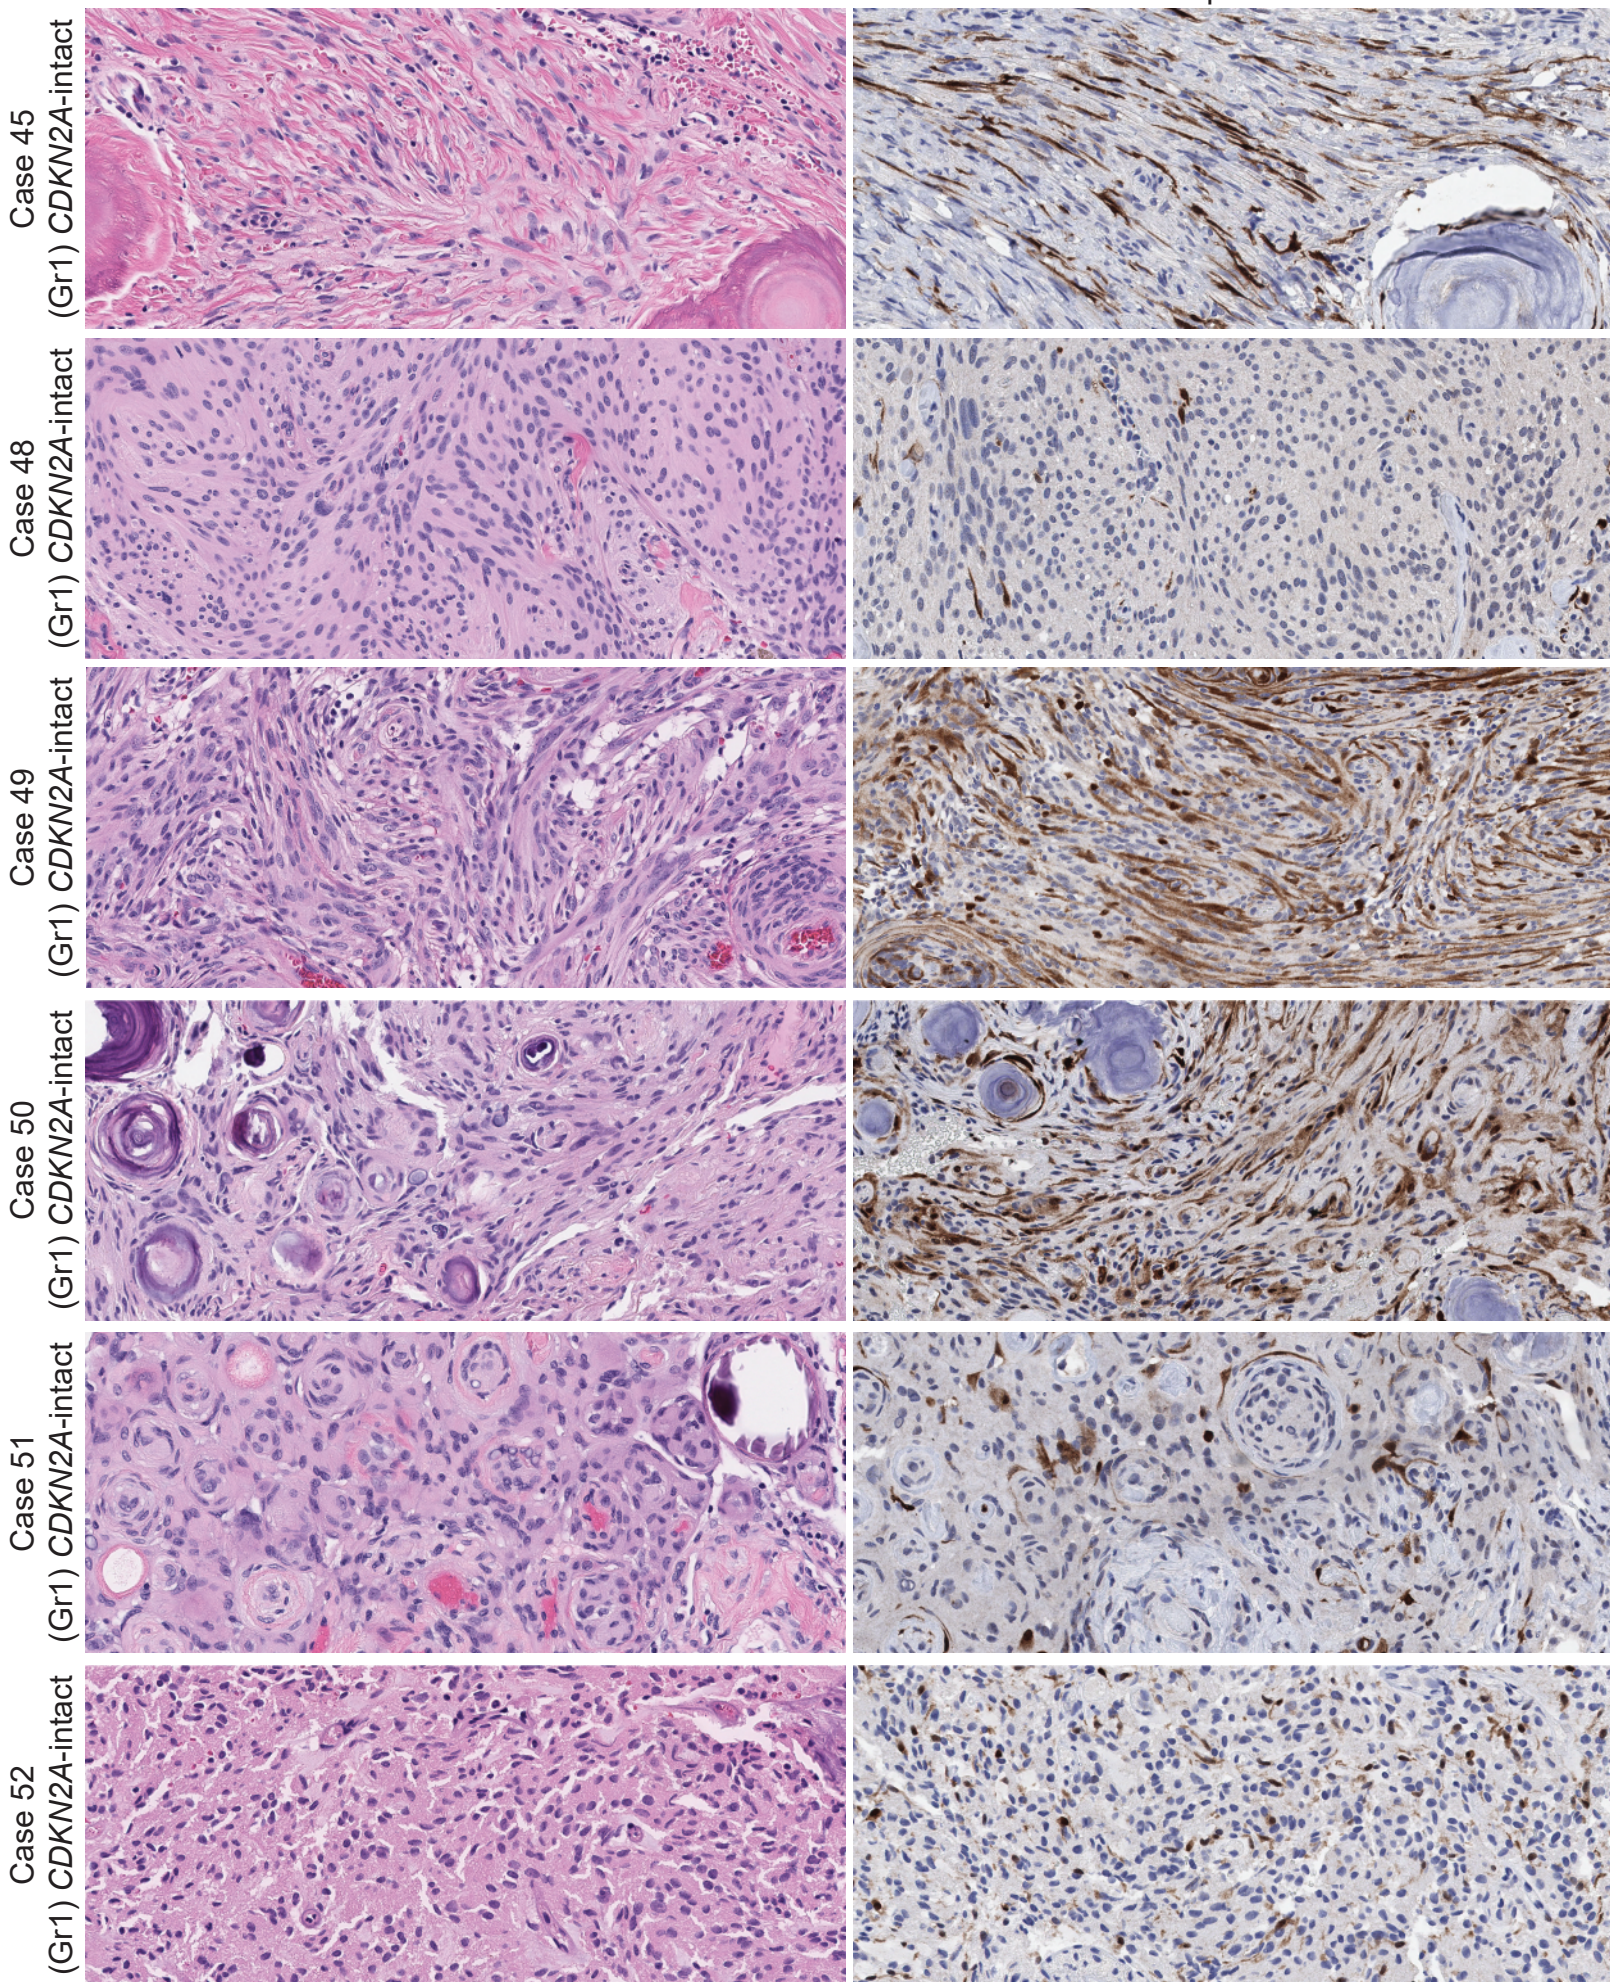

**Supplementary Figure 2.** Spectrum of p16 expression in CNS WHO grade 1 meningiomas with intact/wildtype *CDKN2A* alleles. 9/14 tumors (64%) demonstrated minimal to absent p16 immunoreactivity despite absence of *CDKN2A* alterations.
